# Supplementary material
Source: Springer Nature journal article supplement (https://www.springermedizin.de/resource/supplementary/12885_2010_2639_MOESM8_ESM.pdf/9461612)

**c-Met**

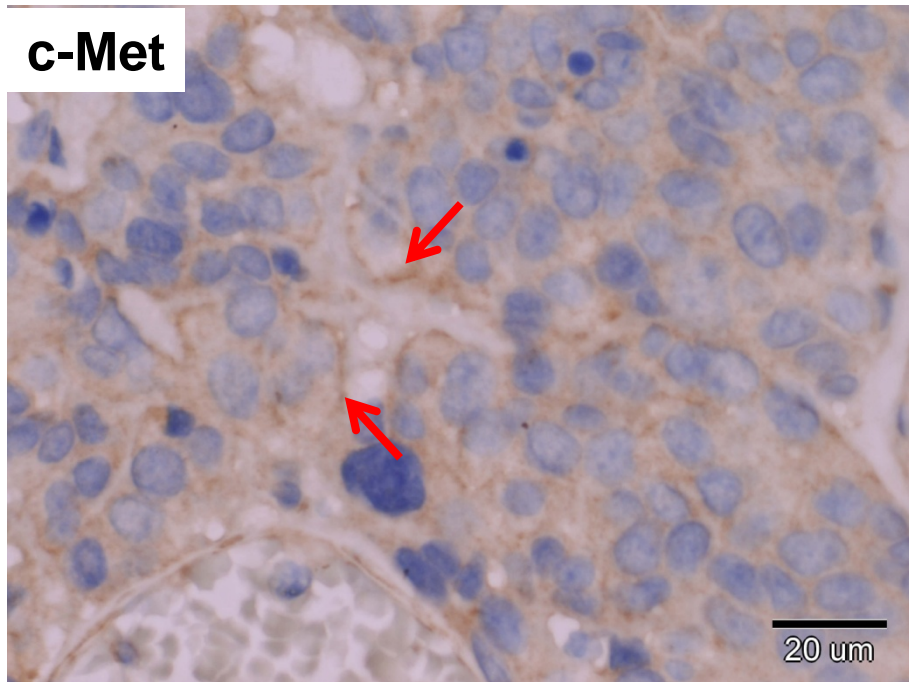

**PDGFR**

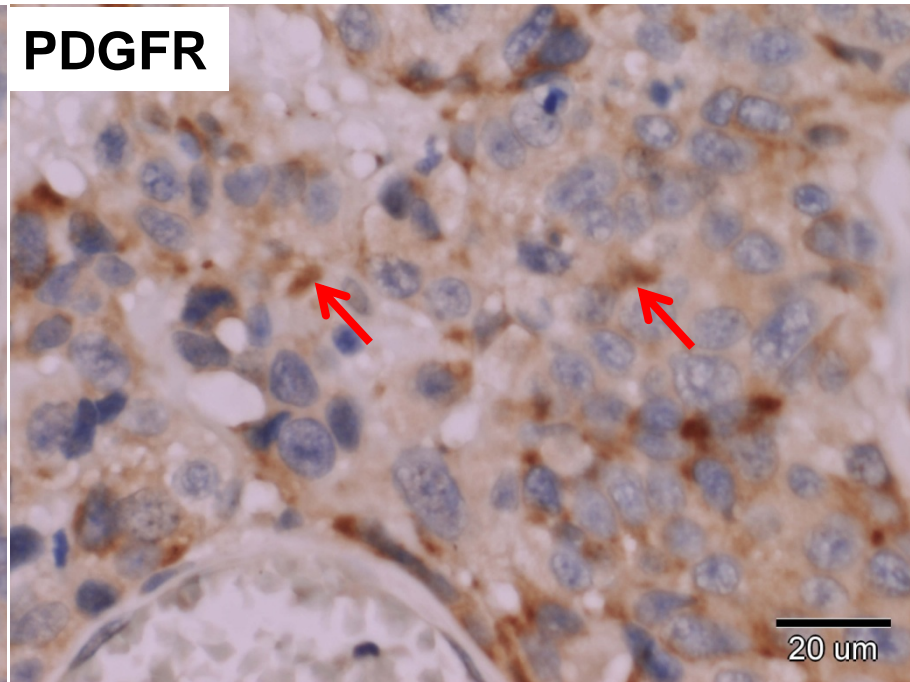

**AXL**

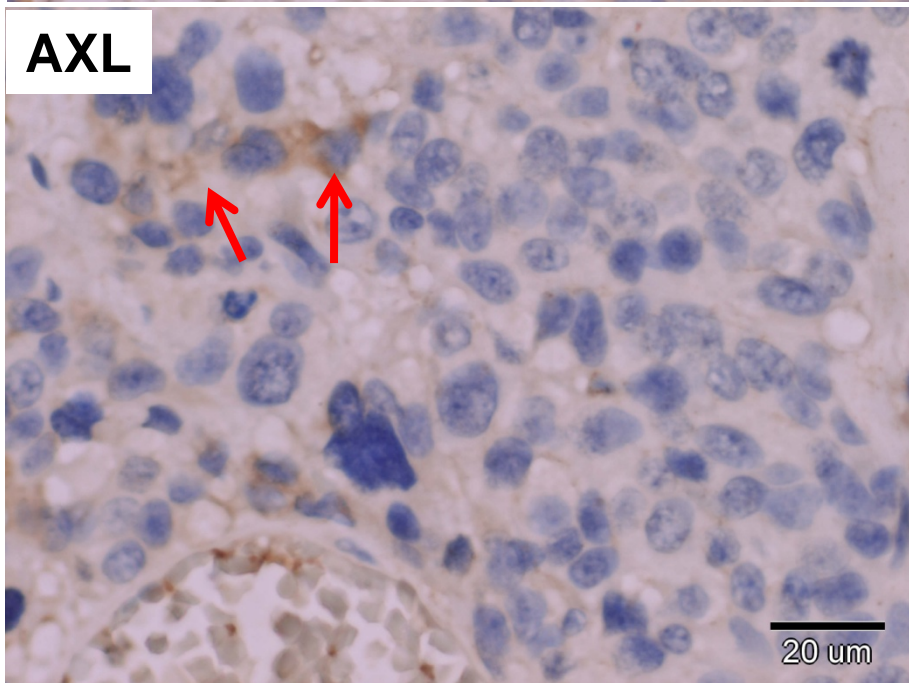

Supplement: MOESM8 [file 9461612]
